# Supplementary material for: KCTD19 and its associated protein ZFP541 are independently essential for meiosis in male mice
Source: PLoS Genet. 2021 May 7;17(5):e1009412. doi: 10.1371/journal.pgen.1009412 (PMC8104389; doi:10.1371/journal.pgen.1009412)
Supplement: S2 Table — (XLSX) [file pgen.1009412.s007.xlsx]

## Sheet: Sheet1
	Antibodies	SOURCE	IDENTIFIER
	Rabbit polyclonal anti-KCTD19	This study
	Rabbit monoclonal anti-KCTD19 (#19-22)	This study
	Rabbit monoclonal anti-KCTD19 (#22-15)	This study
	Rabbit polyclonal anti-gamma-H2A.X	Abcam	Cat# ab11174
	Rabbit polyclonal anti-CENPC	generated in the Dr. Ishiguro Lab [1]
	Rabbit polyclonal anti-HA	MBL	Cat# M180-3
	Rabbit polyclonal anti-HDAC1	Abcam	Cat# ab7028
	Rabbit polyclonal anti-GFP	Abcam	Cat# ab290
	Rabbit polyclonal anti-SYCP1	Abcam	Cat# ab15090
	Rat monoclonal anti-alpha-TUBULIN	Santa Cruz Biotechnology	Cat# sc-53029
	Rat polyclonal anti-GFP (J1)	generous gift from S.C. Fujita at Mitsubishi Institute of Life Sciences, Tokyo, Japan
	Rat polyclonal anti-GFP (J2)
	Rat polyclonal anti-GFP (K5)
	Mouse monoclonal anti-SYCP3	Santa Cruz Biotechnology	Cat# sc-74569
	Mouse monoclonal anti-FLAG	Sigma-Aldrich	Cat# F3165
	Mouse monoclonal anti-HA	MBL	Cat# 561
	Goat anti-rabbit IgG-HRP	Jackson ImmunoResearch	Cat# 111-036-045
	Goat anti-mouse IgG-HRP	Jackson ImmunoResearch	Cat# 115-036-062
	Goat Anti-Rat IgG-micropolymer HRP	Vector Laboratories	Cat# MP-7444
	Goat Anti-Rabbit IgG-micropolymer HRP	Vector Laboratories	Cat# MP-7401
	Goat anti-rabbit IgG-Alexa Fluor 488	Thermo Fisher Scientific	Cat# A11070
	Goat anti-rabbit IgG-Alexa Fluor 546	Thermo Fisher Scientific	Cat# A11071
	Goat anti-rat IgG-Alexa Fluor 488	Thermo Fisher Scientific	Cat# A11006
	Goat anti-rat IgG-Alexa Fluor 546	Thermo Fisher Scientific	Cat# A11081
	Goat anti-mouse IgG-Alexa Fluor 546	Thermo Fisher Scientific	Cat# A11017
	Goat anti-mouse IgG-Alexa Fluor 546	Thermo Fisher Scientific	Cat# A11018
	1. Ishiguro K, Kim J, Fujiyama-Nakamura S, Kato S, Watanabe Y. A new meiosis-specific cohesin complex implicated in the cohesin code for homologous pairing. EMBO Rep. 2011;12(3):267-75.
